# Supplementary material
Source: Royal Society of Chemistry journal article supplement (doi:10.1039/d6an00305b)
Supplement: d6an00305b1.pdf [file d6an00305b1.pdf]

# **Ultra-performance convergence chromatography tandem mass spectrometry strategy for quantification of monodisperse polyethylene glycol polymers coupled with multiple fragmentation to enhance sensitivity**

Jiarui Zhang<sup>a,b</sup>, Hui Miao<sup>c</sup>, Jiale Liu<sup>b</sup>, Xinyue Zhou<sup>b</sup>, Yue Deng<sup>b</sup>, Shuang Feng<sup>b</sup>, Yalin Xi<sup>a\*\*\*</sup>, Meiyun Shi<sup>a,b\*\*</sup>, Lei Yin<sup>a,b\*</sup>.

<sup>a</sup> Central Hospital of Dalian University of Technology, Dalian University of Technology, Dalian, Liaoning 116023, PR China.

<sup>b</sup> School of Chemical Engineering, Ocean and Life Sciences, Dalian University of Technology, Panjin, P.R. China.

<sup>c</sup> Leicester International Institute, Dalian University of Technology, Panjin, P.R. China.

Correspondence

\* Corresponding author, Lei Yin, E-mail addresses: leiyin@dlut.edu.cn (Lei Yin).

\*\* Corresponding author, Meiyun Shi, E-mail addresses: shimy@dlut.edu.cn (Meiyun Shi).

\*\*\* Corresponding author, Yalin Xi, E-mail addresses: yalinxi@163.com (Yalin Xi).

Table S1. Parameters evaluated for assay validation.

| Items                         | Description                                                                                                                                                                                                                                                                                                                                        |
|-------------------------------|----------------------------------------------------------------------------------------------------------------------------------------------------------------------------------------------------------------------------------------------------------------------------------------------------------------------------------------------------|
| Specificity                   | Method selectivity was verified by analyzing blank cell lysates to confirm the absence of endogenous interferences at the retention time corresponding to HO-PEG <sub>6</sub> -OH and its internal standard.                                                                                                                                       |
| Lower Limit of Quantification | The LLOQ was established as the lowest concentration yielding a signal-to-noise ratio $\geq 10$ with RSD $\leq 15\%$ and accuracy within $\pm 20\%$ over six replicate determinations.                                                                                                                                                             |
| Linearity                     | Calibration curves were constructed using $1/X^2$ weighted linear regression of peak area ratios (analyte/IS) versus nominal concentrations. The method demonstrated linearity across the validated range (5–500 ng/mL) with correlation coefficients ( $R^2$ ) $\geq 0.99$ .                                                                      |
| Precision and Accuracy        | Within-run and between-run variations were assessed through six replicate analyses of QC samples at three concentration levels across three consecutive days. The acceptance criteria required relative standard deviation (RSD) $\leq 15\%$ and relative error (RE) within $\pm 15\%$ of nominal values.                                          |
| Recovery and Matrix Effects   | Extraction efficiency was evaluated by comparing peak areas of pre-spiked versus post-spiked samples in triplicate at low, medium, and high concentrations. Matrix effects were quantified as $[(\text{post-extraction spiked sample response})/(\text{neat solution response})] \times 100\%$ .                                                   |
| Stability                     | Sample stability was investigated under four conditions: ambient temperature (4 h), autosampler storage (4 h), three freeze-thaw cycles ( $-30\text{ }^\circ\text{C}$ ), and long-term storage ( $-30\text{ }^\circ\text{C}/15$ days). Analytes were considered stable when concentration deviations remained within $\pm 15\%$ of initial values. |

Table S2. The accuracies and precisions of HO-PEG<sub>8</sub>-OH (Data are for analysis of 6 replicates on 3 different days).

| Concentration (ng/mL)    |              | Accuracy | Precision     |               |
|--------------------------|--------------|----------|---------------|---------------|
| Nominal conc.<br>(ng/mL) | Mean ± SD    | RE (%)   | Intra-day (%) | Inter-day (%) |
| 5                        | 5.08±0.41    | 1.60     | 8.07          | 7.15          |
| 15                       | 14.97±0.70   | -0.22    | 4.87          | 3.22          |
| 50                       | 49.69±2.39   | -0.62    | 4.79          | 4.93          |
| 300                      | 303.22±12.02 | 1.07     | 3.81          | 4.98          |

Table S3. The extraction recoveries and matrix effects of HO-PEG<sub>8</sub>-OH (Mean ± SD, n=4).

| Nominal conc.<br>(ng/mL) | Recoveries (%) | Matrix Effects (%) |
|--------------------------|----------------|--------------------|
| 5                        | 97.52 ± 5.12   | 105.34 ± 6.18      |
| 15                       | 99.92 ± 2.27   | 111.89 ± 7.72      |
| 50                       | 98.79 ± 4.34   | 96.42 ± 4.82       |
| 300                      | 99.27 ± 4.13   | 100.96 ± 4.40      |

Table S4. Stability of HO-PEG<sub>8</sub>-OH under various storage conditions (Mean ± SD, n=3).

| Nominal Conc.<br>(ng/mL) | Long term<br>-30 °C for 15 days | Freeze-thaw<br>-30 °C (3 cycles) | Autosampler vials<br>(4°C) for 4 h | Room temperature<br>for 4 h |
|--------------------------|---------------------------------|----------------------------------|------------------------------------|-----------------------------|
| 5                        | 5.05 ± 0.44                     | 4.82 ± 0.38                      | 5.11 ± 0.29                        | 4.93 ± 0.41                 |
| 15                       | 15.07±0.40                      | 14.97±0.80                       | 15.33±1.14                         | 15.10±0.62                  |
| 50                       | 50.57±2.68                      | 47.87±1.78                       | 50.77±2.87                         | 49.90±1.80                  |
| 300                      | 303.00±22.91                    | 310.67±8.50                      | 295.67±6.66                        | 299.33±11.59                |

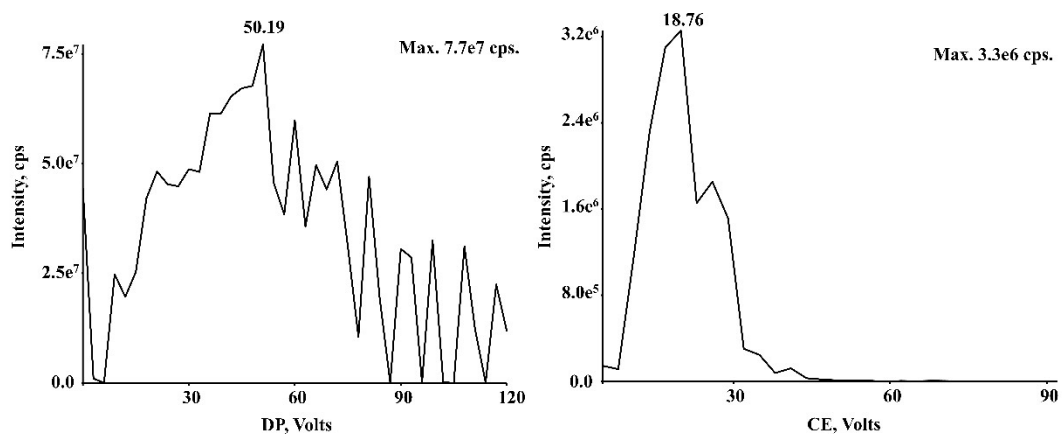

Fig. S1. Optimization of declustering potential (DP) (A) and collision energy (CE) (B) for HO-PEG<sub>8</sub>-OH in UPC<sup>2</sup>-MS<sup>3</sup> analysis.

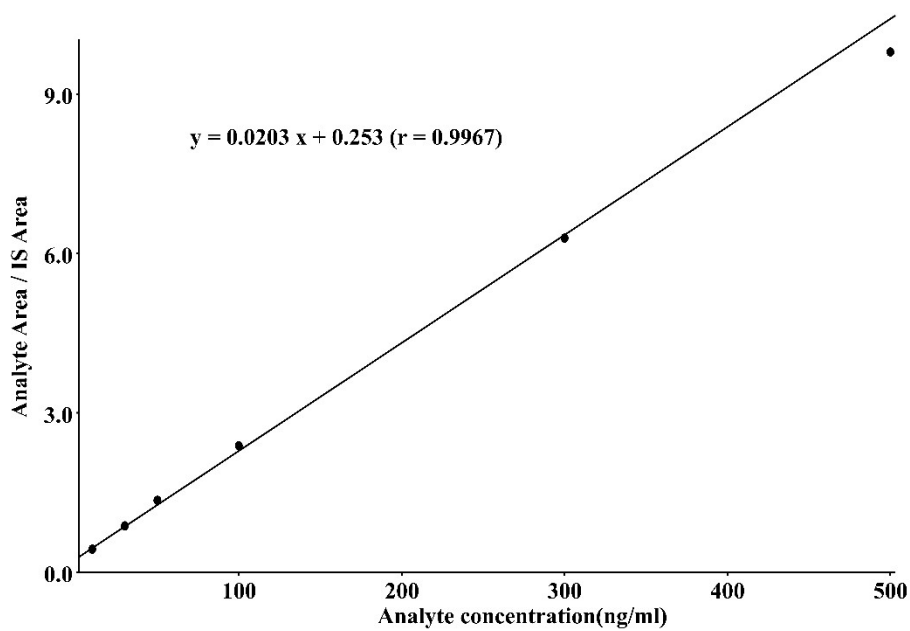

Fig. S2. Typical calibration curve of HO-PEG<sub>8</sub>-OH with the concentration range of 5-500 ng/mL in cell lysate sample.
